# Supplementary material
Source: publisher figshare collection journal article supplement (https://springernature.figshare.com/ndownloader/files/15112925)
Supplement: Supplementary file 1 [file 15112925]

## Sheet: Sheet1
						RT-qPCR test results of 10 unigenes in Acipenser sinensis
#gene/sample	Asib2Mp	Asib2Mh	Asib4Mp	Asib4Mh	Asib4Ms	Asia1p	Asia2p	Asia3p	Asia1h	Asia2h	Asia3h	Asia4h	Asib1Mp	Asib1Mh	Asib6Mp	Asib6Mh	Correlation coefficient with RNA-seq	GeneID
Unigene7648_All	1	1.293	0.826	1.119	35.385	1.387	2.025	1.392	1.932	1.086	2.602	0.957	1.857	1.483	0.904	0.816	0.994125	dmrt1
Unigene44013_All	1	0.011	0.161	0.131	55.167	8.201	2.254	0.894	0.068	0.013	0.024	0.046	6.274	0.09	0.08	0.066	0.915762	dmrt3
CL1658.Contig4_All	1	1.033	0.743	1.307	155.687	2.575	2.725	7.362	3.478	4.304	2.122	2.188	2.217	2.741	0.764	1.487	0.890933	sox17
CL14348.Contig3_All	1	0.506	0.45	0.447	975.124	1.551	0.454	0.607	0.645	0.745	0.379	0.718	2.607	1.086	0.163	0.296	0.998889	amh
Unigene25232_All	1	0.277	0.615	0.388	23.508	3.806	2.116	2.623	1.67	0.837	1.273	0.598	3.033	0.951	0.628	0.329	0.927524	dym
Unigene657_All	1	0.044	0.319	0.19	77.683	0.984	0.969	0.676	1.158	0.475	0.556	0.278	2.773	0.233	0.58	0.095	0.977493	rspo-1
Unigene14053_All	1	0.713	0.101	0.049	21641.5	9.044	6.507	2.789	1.404	0.079	0.027	0.342	2.432	0.017	0.361	1.12	0.998877	wt1
Unigene16375_All	1	0.677	7.486	9.792	469.288	2.229	1.044	8.921	2.225	1.647	12.136	0.393	21.503	9.915	6.349	6.331	0.94991	Vamp3
Unigene58081_All	1	0.535	0.627	0.553	26.284	2.22	1.859	2.251	1.643	1.054	2.081	0.988	2.811	1.331	1.038	0.6	0.631798	srd5a
Unigene14599_All	1	0.133	0.676	0.431	58.322	1.509	1.963	1.801	1.07	0.681	0.903	0.342	2.034	0.426	1.203	0.297	0.883776	Il10rb
